# Supplementary material for: Inkjet printing based assembly of thermoresponsive core–shell polymer microcapsules for controlled drug release
Source: Royal Society of Chemistry journal article supplement (doi:10.1039/c6tb00424e), 2016-01-01
Supplement: c6tb00424e1.pdf [file c6tb00424e1.pdf]

## Electronic Supplementary Information

### Inkjet printing based assembly of thermoresponsive core-shell polymer microcapsules for controlled drug release

*Jianmin Yang, Daisuke Katagiri, Sifeng Mao, Hulie Zeng, Hizuru Nakajima, Shungo Kato and Katsumi Uchiyama\**

*Department of Applied Chemistry, Graduate School of Urban Environmental Sciences, Tokyo Metropolitan University, Minamiohsawa, Hachioji, Tokyo 192-0397, Japan*

*\*Corresponding author.*

*E-mail: uchiyama-katsumi@tmu.ac.jp, Tel: +81-42-6772835, Fax: +81-42-6772821*

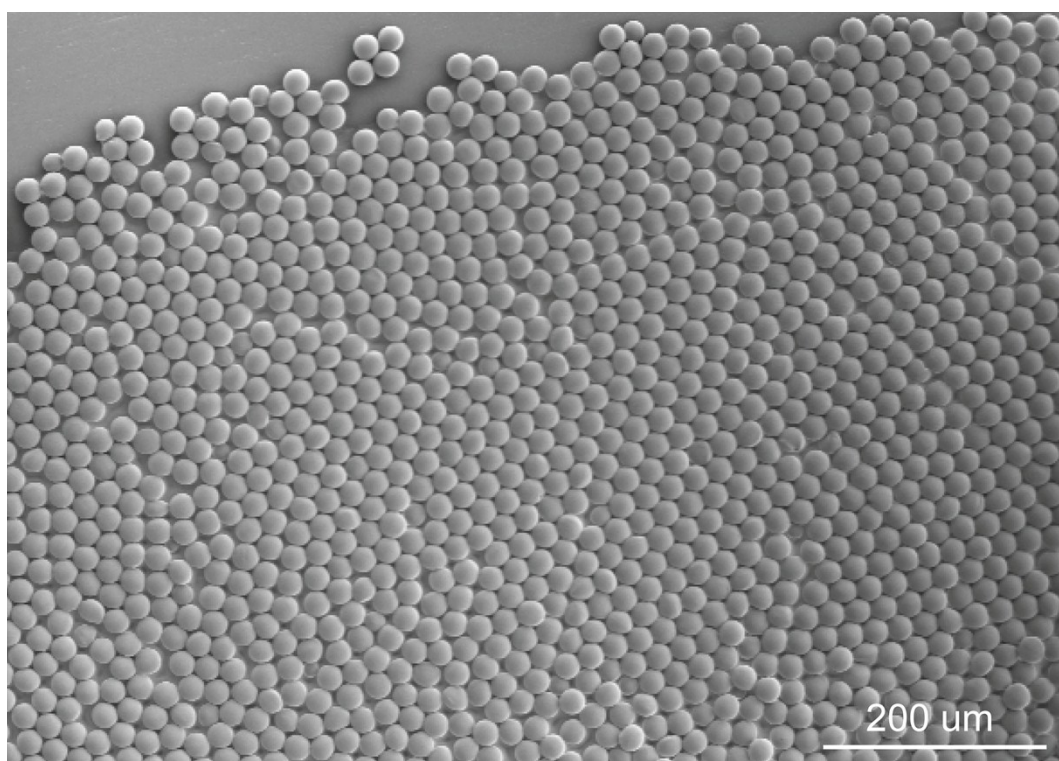

**Fig. S1** SEM image of monodisperse HDDA particles.

**Table S1.** The ingredients and reaction conditions for the synthesis of cross-linked poly(NIPAAm-co-MAA).

| Polymer | NIPAAm<br>(mmol) | MAA<br>(mmol) | MBA<br>(mmol) | KPS<br>(mg) | H <sub>2</sub> O<br>(mL) | Temperature<br>(°C) | Time<br>(h) |
|---------|------------------|---------------|---------------|-------------|--------------------------|---------------------|-------------|
| a       | 0.5              | 0             | 0.05          | 2.5         | 25                       | 70                  | 6           |
| b       | 0.5              | 0.01          | 0.05          | 2.5         | 25                       | 70                  | 6           |
| c       | 0.5              | 0.05          | 0.05          | 2.5         | 25                       | 70                  | 6           |
| d       | 0.5              | 0.10          | 0.05          | 2.5         | 25                       | 70                  | 6           |
| e       | 0.5              | 0.20          | 0.05          | 2.5         | 25                       | 70                  | 6           |

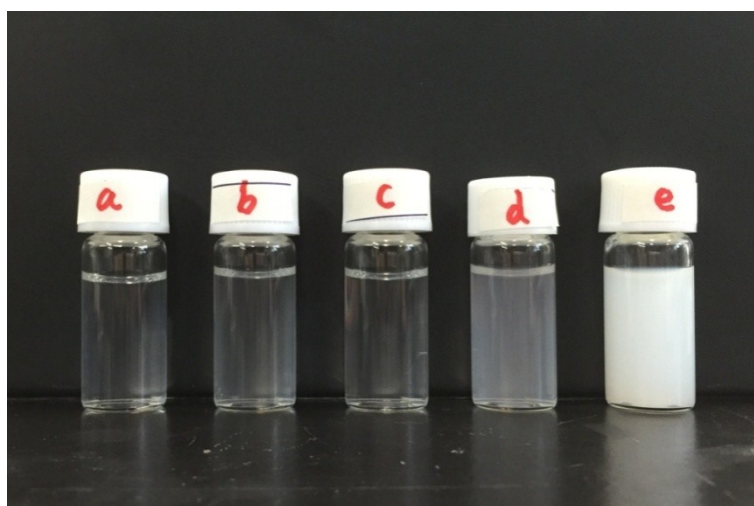

**Fig. S2** Photograph of polymer solutions at room temperature (about 25 °C). The polymer solution with molar ratio of NIPAAm to MAA was, (a) 100:0, (b) 100:2, (c) 100:10, (d) 100:20, and (e) 100:40. Reaction conditions are listed in Table S1. The color of the polymer solutions changed from transparent to milky white with increasing concentrations of MAA.

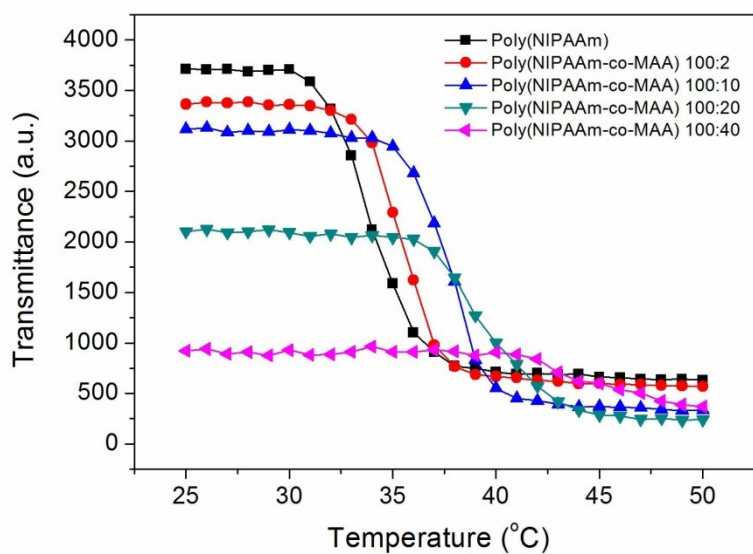

**Fig. S3** Transmittance of various poly(NIPAAm-co-MAA) solutions in PBS from 25 °C to 50 °C.

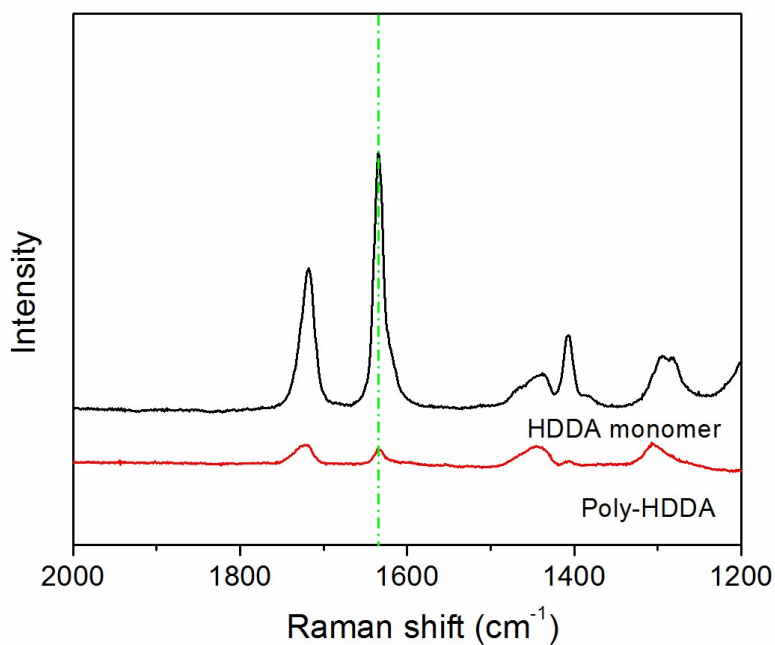

**Fig. S4** Raman spectrum of HDDA monomer and poly-HDDA particles. The peak at 1630  $\text{cm}^{-1}$  is assigned to unsaturated double carbon bonds.

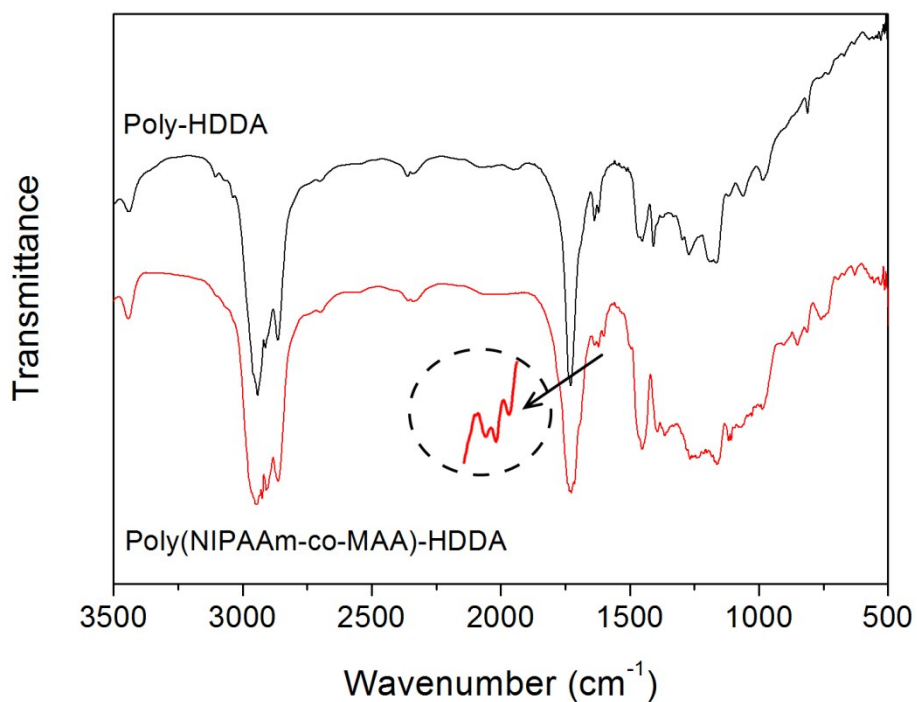

**Fig. S5** FT-IR spectrum of poly(HDDA) particle and poly(NIPAAm-co-MAA) grafted HDDA particle. The main peaks are ( $\lambda$  cm<sup>-1</sup>): 1725, 1630, and 1590, which represent a stretching vibration of C=O, unsaturated double bonds, and bending frequency of amide N-H, respectively. The bending frequency of amide N-H indicates that the NIPAAm based copolymer was successfully synthesized on the HDDA particles.

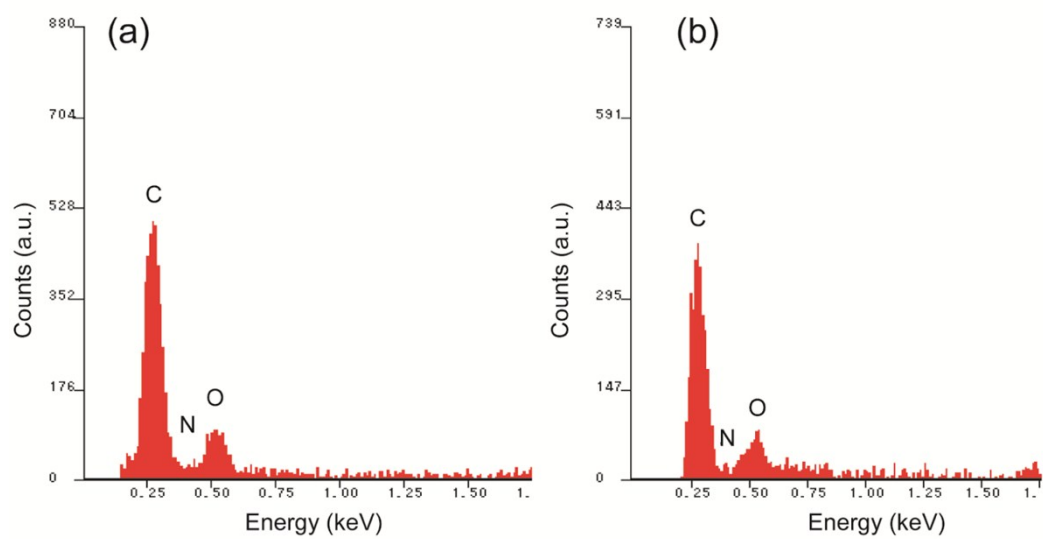

**Fig. S6** EDX characterization of (a) HDDA particles and (b) poly(NIPAAm-co-MAA) grafted HDDA particles. A peak corresponding to nitrogen was found in the poly(NIPAAm-co-MAA) grafted HDDA, whereas there no nitrogen was observed in the HDDA sample.

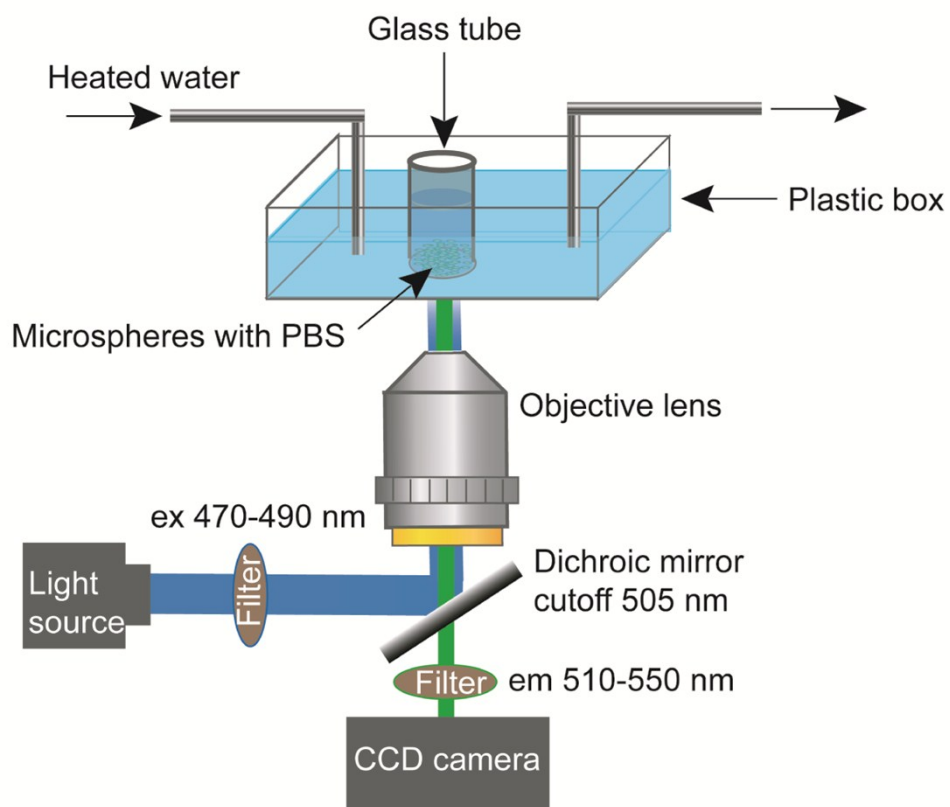

**Fig. S7** Schematic illustration of the set-up used to investigate the enclosing and release of thermoresponsive hollow microcapsules.
